# Supplementary material for: New structurally rigid palladium catalysts for the alternating copolymerization of carbon monoxide and ethene
Source: Royal Society of Chemistry journal article supplement (doi:10.1039/b000376j), 2000-01-01
Supplement: b000376j.doc [file b000376j.doc]

New structurally rigid palladium catalysts for the alternating copolymerization of carbon monoxide and ethene

Claudio Bianchini,* Hon Man Lee,Andrea Meli,Werner Oberhauser,Francesco Vizza,Peter Brüggeller,Rainer Haid and Christoph Langes

**Supplementary Material**

**Experimental Section**

**General Procedure.** All reactions and manipulations were carried out under an atmosphere of nitrogen by using Schlenk-type techniques. The starting materials *cis*, *trans*, *cis*-1,2,3,4-tetrakis-(diphenylphosphino)cyclobutane (*cyclo*-tetraphos)(1) and Pd(*cis*-dppen)Cl2(2) were prepared according to literature methods. Diethyl ether and THF were distilled from LiAlH4. Reagent grade MeOH was used in all copolymerization reactions. All the other reagents and solvents were used as purchased from Aldrich, Fluka or Strem. Copolymerization reactions were performed with a 250 mL stainless steel autoclave, constructed at the ISSECC-CNR (Firenze, Italy), equipped with a magnetic drive stirrer, a Parr 4842 temperature and pressure controller. The autoclave was connected to gas reservoir to maintain a constant pressure all over the catalytic reactions. Deuterated solvents for NMR measurements were dried over molecular sieves. 1H, 13C{1H}, and 31P{1H} NMR spectra were obtained on either a Bruker ACP 200 (200.13, 50.32, and 81.01 MHz, respectively) or a Bruker DPX 300 spectrometer (300.13, 75.49, and 121.51 MHz, respectively). All chemical shifts are reported in ppm () relative to tetramethylsilane, referenced to the chemical shifts of residual solvent resonances (1H, 13C) or 85% H3PO4 (31P). Elemental analyses were performed using a Carlo Erba Model 1106 elemental analyzer. Infrared spectra were recorded on a Perkin-Elmer 1600 Series FT-IR spectrophotometer or a Mattson Galaxy 3000 series FT-IR spectrophotometer.

**Pd2(PPh2CH)4(OCOCH3)4 (1).** To 4 mL dichloromethane solution of 30.7 mg of Pd(II) acetate (0.135 mmol) was added 54.2 mg of *cis*, *trans*, *cis*-1,2,3,4-tetrakis-(diphenylphosphino)cyclobutane(1) (0.068 mmol). The colour of the solution changed immediately to yellow. The solution was allowed to stir for 15 h. By then the colour changed to orange. A light brown solid was formed upon slow addition of 30 mL of diethyl ether. The solid was filtered, washed with diethyl ether and dried under vacuum for 2 h. Yield: 52.8 mg, 63%. 31P{1H} NMR (CD2Cl2):  67.0 (s). 1H NMR (CD2Cl2): 1.46 (s, 12H, OCOCH3), 4.26 (*pseudo* triplet, 2J(P-H) = 7.0 Hz, 4H, CH), 7.15-7.64 (m, 40H, aromatic protons). 13C{1H} NMR (CD2Cl2):  24.0 (s, CH3), 38.7 (s, CH), aromatic carbons (129.9 (s), 132.6 (s), 134.7 (s), 135.4 (s)), 177.1 (s, O*CO*CH3).

**Pd2(PPh2CH)4Cl4 (2).** To a suspension of 31.21 mg (0.176 mmol) of Pd(II) chloride in 15 mL of DMF was added 70.0 mg of *cyclo*-tetraphos (0.088 mmol). The suspension became clear after stirring for 30 min. On further stirring, a solid began to separate. After 6 h the solvent was removed completely under vacuum to give a white solid which was washed several times with diethyl ether and dried under vacuum overnight. The solid has a very low solubility in common organic solvents. Yield: 91.9 mg, 91%. 31P{1H} NMR (DMF):  78 (s).

**[Pd2(PPh2CH)4(CH3CN)4](PF6)4 (3/PF6).** To a suspension of 102 mg of Pd2(PPh2CH)4Cl4 (0.089 mmol) in 20 mL of acetonitrile under vigorous stirring was added 101.1 mg of AgPF6 (0.40 mmol). The mixture was allowed to stir for 2 d. Then the solvent was removed completely under vacuum to give a light brown solid which was washed several times with diethyl ether and dried under vacuum overnight. Yield: 109 mg, 70%. Crystals suitable for X-ray measurement were obtained by slow evaporation of a dichloromethane/acetonitrile solution. 31P{1H} NMR (CD3CN):  79.3 (s). 1H NMR (CD3CN):  4.6 (s, 4H, CH), 3.0 (s, 12H, CH3CN), 7.3-8.2 (m, 40H, aromatic protons). IR (KBr): (C-N): 1656 (s) cm-1.

**Pd(dppe)(OCOCH3)2 (4).** To a 10 mL of methanol solution of 169 mg of Pd(II) acetate (0.753 mmol) was added a dichloromethane solution of 300 mg of dppe (0.753 mmol). The orange-red mixture was allowed to stir for 20 min. Then the volume was reduced to *ca*. 1 mL under reduced pressure. Petroleum ether (30 mL) was slowly added to give an orange-red solid which was filtered, washed with petroleum ether and dried by a stream of nitrogen. Crystals suitable for X-ray measurement were obtained by slow evaporation of a saturated solution of dichloromethane/toluene (1:1) of the complex. Yield: 164 mg, 35%. 31P{1H} NMR (CD2Cl2):  58.9 (s). 1H NMR (CD2Cl2):  1.66 (s, 6H, OCOCH3), 2.23 (d,2J(P-H) = 22.0 Hz, 4H, CH2 ), 7.52-7.83 (m, 20H, Ph). 13C{1H} NMR (CD2Cl2):  23.5 (s, CH3), 27.5 (AXX' system, 1J(C-P) = 36.6 Hz, 2J(C-P) = 12.8 Hz, CH2), aromatic carbons (129.6 (s), 131.4 (s), 132.8 (s), 134.1 (s)), 176.6 (s, O*CO*CH3).

**Pd{C6H4(PPh2)2}(OCOCH3)2 (5).** To a solution of 150 mg of Pd(II) acetate (0.672 mmol) in 20 mL of dichloromethane/methanol (10:1) was added 300 mg of 1,2-bis(diphenylphosphino)benzene (0.672 mmol). The resulting red solution was stirred for 2 d. Then the volume was reduced to ca 2 mL under reduced pressure. A light brown solid was formed upon addition of 30 mL of petroleum ether. The solid was filtered on a frit, washed with petroleum ether and dried by a stream of nitrogen. Yield: 325 mg, 72%. 31P{1H} NMR (CD2Cl2):  56.9 (s) 1H NMR (CD2Cl2):  1.60 (s, 6H, OCOCH3), 7.18-7.80 (m, 24H, aromatic protons). 13C{1H} NMR (CD2Cl2): : 23.5 (s, CH3), 176.5 (s, O*CO*CH3), aromatic carbons (128.9-134.6).

**Pd(PPh2CH=CHPPh2)(OCOCH3)2 (6)**.To a suspension of 313.0 mg of Pd(*cis*-dppen)Cl2(2) (0.545 mmol) in 30 mL of CH2Cl2 was added 227.7 mg of silver acetate (1.134 mmol). The mixture was allowed to stir for 5 h and then filtered through a column of Celite 521 to remove AgCl formed. The clear orange-red solution was concentrated to ca. 4 mL under reduced pressure. Then 30 mL of cold diethyl ether was slowly added to give an orange-brown solid which was filtered on a frit, washed with cold diethyl ether and dried by a stream of nitrogen. Yield: 225 mg, 70%. 31P{1H} NMR (CD2Cl2):  65.5 (s). 1H NMR (CD2Cl2):  1.70 (s, 6H, OCOCH3), 7.08 (AA'XX' system, 3J(P-H) = 60.0 Hz, 2J(P-H) = 13.0 Hz, 2H, CH), 7.44-7.84 (m, 20H, aromatic protons) 13C{1H} NMR (CD2Cl2):  23.4 (s, CH3), aromatic protons (129.7 (s), 129.9 (s), 132.8 (s), 133.7 (s), 133.9 (s)), 146.2 (dd, 1J(P-C) = 48.4 Hz, 2J(P-C) = 27.0 Hz, CH), 176.4 (s, OCOCH3).

**Copolymerization of Ethene and Carbon Monoxide at Constant Pressure.** A 100 mL solution of MeOH containing 86.5 mg of 1,4-benzoquinone (BQ, 0.8 mmol), 38.0 mg of *p*-toluenesulphonic acid (TsOH, 0.8 mmol) and 0.01 mmol of catalyst was introduced into a mechanically stirred autoclave with an internal volume of 250 mL under nitrogen. The autoclave was charged with 300 psi of CO and 300 psi of C2H4. After the contents of the autoclave had been brought to 85 °C, the pressure was then maintained at ca. 700 psi by introducing under pressure a 1:1 CO/C2H4 mixture. The reaction mixture was then stirred (1400 rpm) for the required reaction time. The reaction was stopped by cooling the autoclave to room temperature by means of an ice-water bath. After the unreacted gases were released, the formed insoluble white ethene-carbon monoxide copolymer was filtered off, washed with methanol, and dried in a vacuum oven at 70 °C overnight.

**References**

(1) Oberhauser, W.; Bachmann, C.; Stampfl, T.; Haid, R.; Langes, C.; Kopacka, H.; Rieder, A.; Brüggeller, P. *Inorg. Chim. Acta.* **1999**, *290*, 167.

(2)Chow, K. K.; Levson, W.; McAuliffe, C. A. *Inorg. Chim. Acta*. **1974**, *15*, 79.
